# Supplementary material
Source: publisher site journal article supplement (http://www.kjim.org/upload/media/kjim-2023-354-Supplementary-Table-1.pdf)
Supplement: Supplementary file 1 [file kjim-2023-354-Supplementary-Table-1.pdf]

**Supplementary Table1. Characteristics of antibiotics administered within 30 days**

| Variable                               | MDR bacteremia (n = 17) | Non MDR bacteremia (n = 33) | p value |
|----------------------------------------|-------------------------|-----------------------------|---------|
| <b>Classification</b>                  |                         |                             |         |
| 1st or 2nd generation cephalosporin    | 0 (0.0)                 | 3 (9.1)                     | 0.54    |
| 3rd or 4th generation cephalosporin    | 5 (29.4)                | 9 (27.3)                    | > 0.999 |
| Fluoroquinolones                       | 2 (11.8)                | 3 (9.1)                     | > 0.999 |
| Amoxicillin or amoxicillin/clavulanate | 2 (11.8)                | 1 (3.0)                     | 0.24    |
| Piperacillin/tazobactam                | 3 (17.6)                | 11 (33.3)                   | 0.47    |
| Carbapenem                             | 3 (17.6)                | 1 (3.0)                     | 0.09    |
| Others <sup>a)</sup>                   | 5 (29.5)                | 16 (48.5)                   | 0.39    |
| Unknown                                | 2 (11.8)                | 2 (6.1)                     | 0.60    |
| <b>Route</b>                           |                         |                             |         |
| Intravenous                            | 4 (23.5)                | 9 (27.3)                    | > 0.999 |
| Oral                                   | 8 (47.1)                | 13 (39.4)                   | 0.60    |
| Both (intravenous + oral)              | 3 (14.6)                | 9 (27.3)                    | 0.51    |
| Unknown                                | 2 (11.8)                | 2 (6.1)                     | 0.60    |
| <b>Duration</b>                        |                         |                             |         |
| ≤ 1 week                               | 10 (58.8)               | 23 (69.7)                   | 0.44    |
| > 1 week                               | 7 (41.2)                | 10 (30.3)                   | 0.44    |

Values are presented as number (%).

MDR, multidrug-resistant.

<sup>a)</sup>Others included trimethoprim-sulfamethoxazole, rifamycin, azithromycin, and metronidazole.
